# Supplementary material
Source: PubMed Central journal article supplement (PMC6114144)
Supplement: NIHMS1501924-supplement-2.pdf [file NIHMS1501924-supplement-2.pdf]

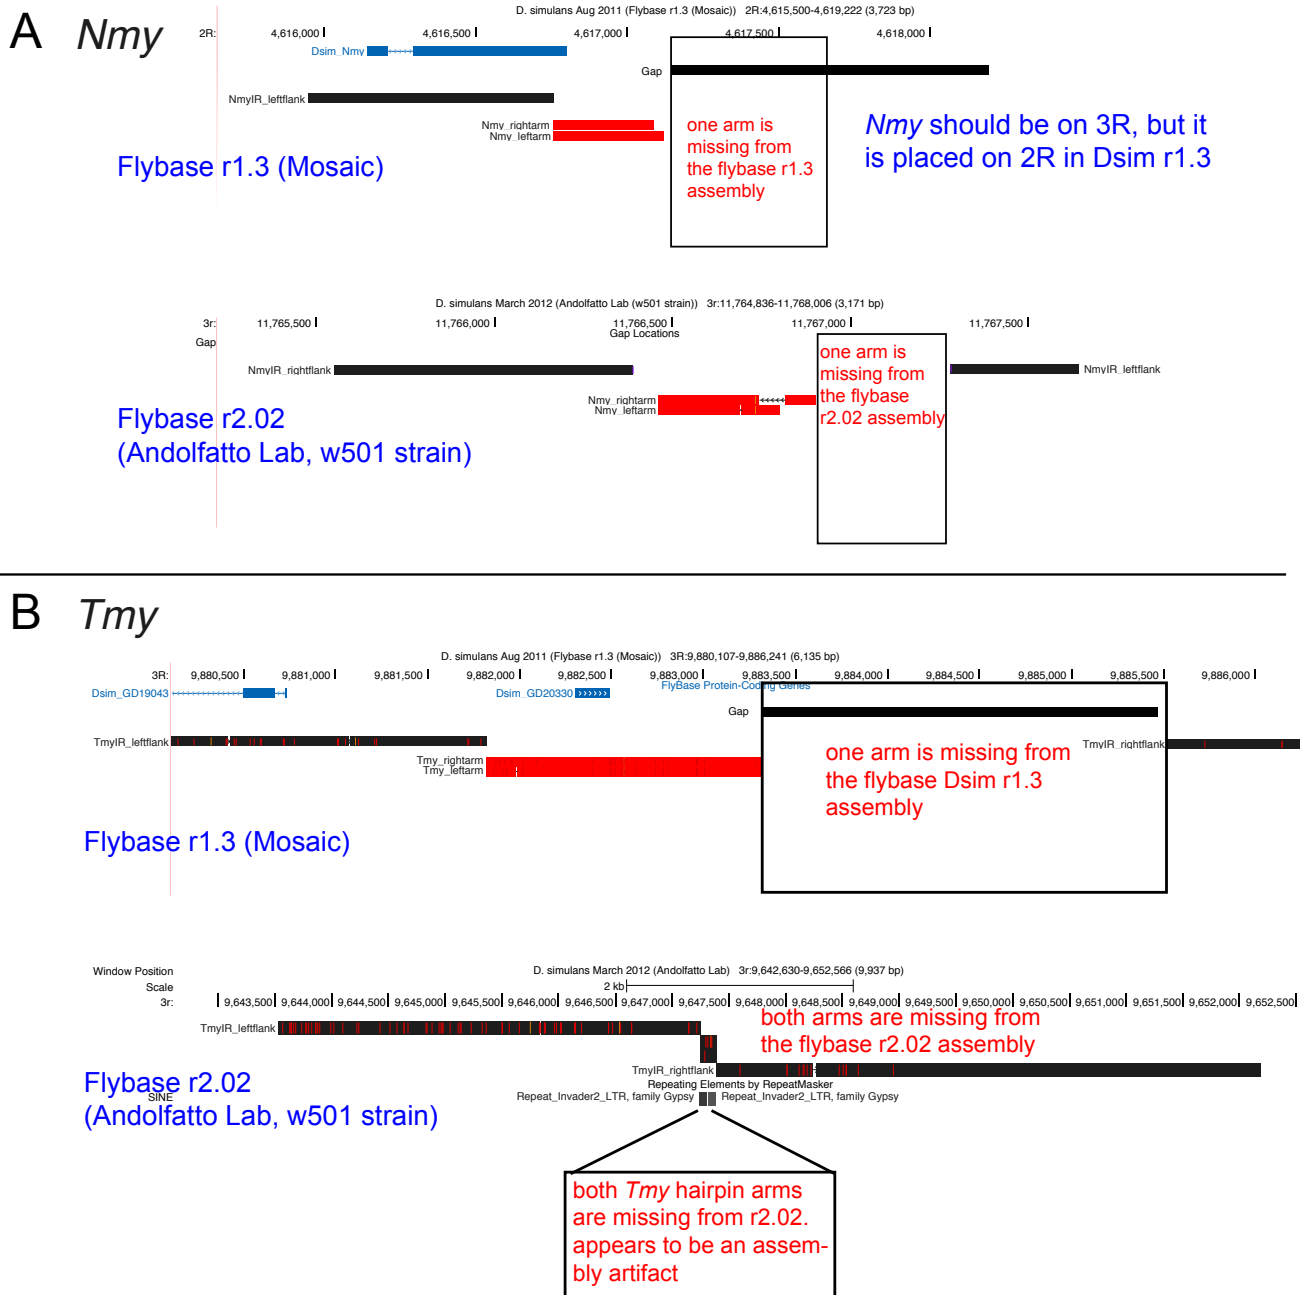

**Figure S1. Related to Figures 1 and 2.**  
**Assembly issues of *Nmy* and *Tmy* regions in available *D. simulans* genome versions.**

(A) *Nmy* is genetically known to localize to chromosome 3R, but it is misplaced onto 2R in the mosaic *D. simulans* genome assembly r1.3. This version also contains a gap, so that only one hairpin arm of *Nmy* is contained in the assembly. Since we have biochemically shown that these siRNAs are produced from a hpRNA precursor, and that a *nmy* mutant deleted for one of hpRNA arms cannot produce siRNAs, we know that this represents an assembly artifact. In the updated assembly r2.02 from the w501 strain, *Nmy* is correctly placed at the known location on chromosome 3R, but it still contains a gap, such that only one hairpin arm is present in the assembly. (B) *Tmy* is genetically delimited by introgressions to an ~80 kb region on chromosome 3R. We recognized a small RNA producing locus in this region that includes perfect matches to some *Nmy* siRNAs. This region is gapped in Dsim r1.3, and the small RNA producing regions are missing from the r2.02. However, PacBio assembly (Figure 2) resolves both of these regions within a full contig, showing that both *Nmy* and *Tmy* are hpRNAs.

Dox TCGTTACTTGGCACAGTTGTAAGACACATCACATTATTTAAATCTTACACGGCAAAAGCCGTGTTCCAAATTCGTACATTAATAATACGGTTTTTTT

Tmy GCCTGAATTTGGAATGTTATACCTTGTGAGCGTCATGCGTTGCAACCCTGATGGCCACTCTGCGCCACCATGTCTCTTG

Dox TGCCTTAACTATAAAAAATAAAAGCCTGAATTTGGAATGTTATACCTTGTGAGCGTCATGCGTTGCCCTGAGGCTTCTGCGCCACCATGTCTCTTG

Tmy TCCGCCGATGAACACGATGATCAAGCAGGGCGCCCTGCCCTTCAACACCTCCTCTGCTACGTCAATGCTACCAAGAAAGGTAGTCGACGGCTGCAA

Dox TCCGCCGATGAACACGATGATCAAGCAGGGCGCCCTGCCCTTCAACACCTCCTCTGCTACGTCAATGCTACCAAGA-GGTAGTCGACGGCTGCAA

Tmy CGCCTTCGTGCCAACATCAATACCTGCATCGCCAGCATGACATAAGCGCTTCCAAAAATGGTAATAAAACATTTGAAATTTATAAGCAAGCAGATGCTG

Dox CGCCTTCGTGCCAACATCAATACCTGCATCGCCAGCATGACATAAGCGCTTCCAAAAATGGTAATAAAACATTTGAAATTTATAAGCAAGCAGATGCTG

Tmy TTTTATTAAAGAAACATACTGCTCTAGCAGTATCAATGGGGTGGACACCAACAAAACAAAAAGTAGAATCTGAAGTGAAGGATTGCAGATCACTGCA

Dox TTTTATCAAGAAACATACTGCTCTAGCAGTATCAATGGGGTGGACACCAACAAAACAAAAAGTAGAATCTGAAGTGAAGGATTGCAGATCACTGCA

Tmy ACCAACACCCATTTTGTCCAAGTTAGTAGTCAACAACAGTAGTTAAACACGTTACTCTGAGACTAAAAGGGTATACTAGATTCTGTTGAAATGATGTA

Dox ACCAACACCCATTTTGTCCAAGT-----CACAACCTAGTTAAGCACGTTACTCTGAGACTAAAAGGGTATACTAGATTCTGTTGAAATGATGTA

Tmy CTTAGTCTCCGACCATAAAAGTGTACAACACGTCGATACGATTGACCAAAAATTTCTTTGCCACACCGAATTAATAGCGCGGGGGTAGAAATTTAAA

Dox CTTAGTCTCCGACCATAAAAGTGTACAACACGTCGATACGATTGACCAAAAATTTCTTTAGCCACACCGAGTTAATAGCGCGGGGGTAGAAATTTAAA

MDox AGCGCGGGCTAGAAATTTAAA

Tmy TAAGCT-AATTAATTAATTTAATTTAATATGATGAACCTACCACACCGCCAAACGGCAAAGGAAACATGGGG-CGTACCACCTAACAGAAAGGATGTTT

Dox TAAGCTGAAT-ATTAATATTTAATTTAATATGATGAACCTACCACACCGCCAAACGGCAAAGGAAACATGGGGCGGTACCACCTAACAGAAAGGATGTTT

MDox TAAGCTGAAT-ATTAATATTTAATTTAATATGATGAACCTACCACACCGCCAAACGGCAAAGGAAACATGGGG-----

Tmy CGCAGGATGCGAATCCGCGAGCGTCGTTTGTGATCAAACTAACTTTATCCATCTAGTTGGCGTGGGGTTGCGTACACGTATACAGCTAGCAATTCGG

Nmy CATCTAGTTGGCGTGGGGTTGCGCTACACGTATACAGCTAGCAATTCGG

Dox CCCAGGATGCGAATCCGCGGGGTCGTTTGTGATCAAACTAACTTTATCCATCTAGTTGGCGTGGGGTTGCGCTACACGTATACAGCTAGCAATTCGG

mDox ----GATGCGAATCCGCGGGTCGTTTGTGATCAAACTAACTTTATCCATCTAGTTGGCGTGGGGTTGCGCTACACGTATACAGCTAGCAATTCGG

Tmy TTATTCGAACCCCATTCGTTACTTGGTACAGTTGTAAGACACATCAAATAAAAAAAGAAAAATTTACTGTTATCATACAACAAATAATACCATATT

Nmy TTTTTCGAACCCCATTCGTTACTTGGGACAGCTGTAAGACACATCAA-----

Dox TTTTTCGAACCCCATTCGTTACTTGGGACAGCTGTAAGACACATCAA-----

mDox TTTTTCGAACCCCATTCGTTACTTGGGACAGCTGTAAGACACATCAA-----

Tmy AAATCCCTCTCCTTTTCTTTTTCAGAAATTTGATACAGAAATCTACAATTTCTATA-GAA-AAAAGGAAATGCCTTCGATCAATCCATTTTGAATA

Nmy -----TTGATAAAATAAATCTAAAATAATCTATC-GAA-AAAAA-AAAATGCCCTCAATAAACCCATTTTTCATA

Dox -----TTGATAAAATAAATCTAAAATAATCTATCTAAAACAAAAAAATGCAATTCAGTAAATCCGTTTTCATA

mDox -----TTGATAAAATAAATCTACAACAATCTATA-GAA-AAAAATAATGCGCTTCGGTAAATCCCTTTTTCATA

exon1

Tmy TGTGGCTAAATACCGTAGAGAATCCAGACCT-AAAACACAAACCGCTTATCGTATCAAGAGCTGCGGAT----GAATATAAT-GCTTT-A-T-CG

Nmy TGTAGCTACATTCGTAAGGAACATCAAGAGCTTAAAAA-CAAAGTGTATCGCACAAAGAGCTAGGGATTCATGGAAT-----GTCTTAACATACACA

Dox TGTAGCTACATTCGTAAGGAACATCAAGAACTTAAAAAT-CAAAGTGTATCGCACAAAGAGCTAGGGATTCATGGAAT-----CTTTTAACATACACA

mDox TGTAGCTAAATTCGTAGGAGCATCGAGAGCTAAGAGAT-CAACGCTTATCGCAAAAAGAGCTAGGGATTCATGGAAT-----TCCCTAATACACA

exon1 exon2 Dox/MDox forward qPCR primers

Nmy AGAGAAAAATATCTACCGGAACAG-----CGCGCGATGAACAAAATCGGCGTCGGAGAGTG

Dox AGAGAAAAATATCTACCGGAACAGGCGCGCATGAACAAAATCGGCGTCGGAGAGTGGCAGTACAGGCGCGGATGAACAAAATCGGCGTCGGAGAGTG

mDox GGAGAAAAATATCTACCGGAACAGGCGCGCATGAACAAAATCGGCGTCGGAGAGTGGCAGTACAGGCGCGGATGAACAAAATCGGCGTCGGAGAGTG

exon1 exon2 Dox/MDox reverse qPCR primers exon3

Nmy GCAGTAATGCCAGCGATGCCGTGCCAAG

Dox GCAGTAATGCCAGCGATGCCGTGCCAACAATGCCGTTATTACAATTTG

Dox CATCTATGTTATCCCAATCGAAAACCGGGAAAACCGATAATGGCAGTAATGCCGGCAACGATGCCGTTATACCAAAATAGCATTTTCTGCACTGCT

mDox -----GCATTTCTGCACTGCT

exon3

Dox TTTGTTGGTGTGTTTTTTTGGTTTGGAAATATCATCCTATGCTTTTAAAGTGAACAAAATAATCAGTTTTTTGTCAGAACA-TTGCAAATTTGAAAG

mDox TTTGTTGGTGTGTTTTT-----GGTTGG-----TTTGTCTTTAAGTGAACAAAATAATCAGTTTTTTGTCAGAACAGTTACCATAGTTGAAAG

exon3

Dox TTATCCCACAAAATATGCGAAAAATACCCAAAATTAATTTCCATAAATCTTTAAAAAATGATAGGGATCGTTATTCGTTTAGGGCTGAACACTTTTA

mDox TTATCCCACAAAATATGCGAAAAATACCCAAAATTAATTTCCATAAATCTTTAAAAAATGATAGGGATCGTTATTCGTTTAGGGCTGAACACTTTTA

Dox TTGTCGGTTGATTAAAACCTAAAATCTGAACTAATCTTGACAGAATTATAGACATCTTGATCTTTAAAGGTGAGAAGTTGCTTACTTAGATGATTTTA

mDox TTGTCGGTTGATTAAAACCTAAAATCTGAACTAATCTTGACAGAATTATAGACATCTTGATCTTTAAAGGTGAGAAGTTGCTTACTTAGATGATTTTA

Dox TTGCAATAAAAATGATTTAATTTTAGGAATTTGATTTCAGCTTCTTAATACCAGTGGCGGCTGAAGAGGAGAGCGGTTAGGAACCGCTCAACAGGTAT

mDox TTGCAATAAAAATGATTTAATTTTAGGAATTTGATTTCAGCTTCTTAATACCAGTGGCGGCT

Dox CTGGGTATCTGATGGTGGAGTAGACACCGCAAGCGGATCACCCAACCGATACCGTCTAGTTGACGGCTTTGTGGAAGCGGACGAGCACCT

**Figure S2, Related to Figures 2-4.**  
**Alignment of the complementary hairpin arms of *Tmy* and *Nmy* with the transcribed strands of *Dox* and *MDox*.**

Regions are color-coded as in Figure 4, according to whether there is pairing only between *Tmy* and *Dox* (yellow), pairing amongst all four (orange) or pairing between *Nmy* and *Dox/MDox* (purple). The positions of *Dox/MDox* qPCR primers are noted in boxes. We were able to design primers in exon 1 with at least 6 mismatches between *Dox* and *mDox*, and especially that exhibit at least two mismatches within the last 5 nt of the primers. In addition, there is a mismatched nucleotide within the amplicon that we used to verify on-target amplification of qPCR products by sequencing.

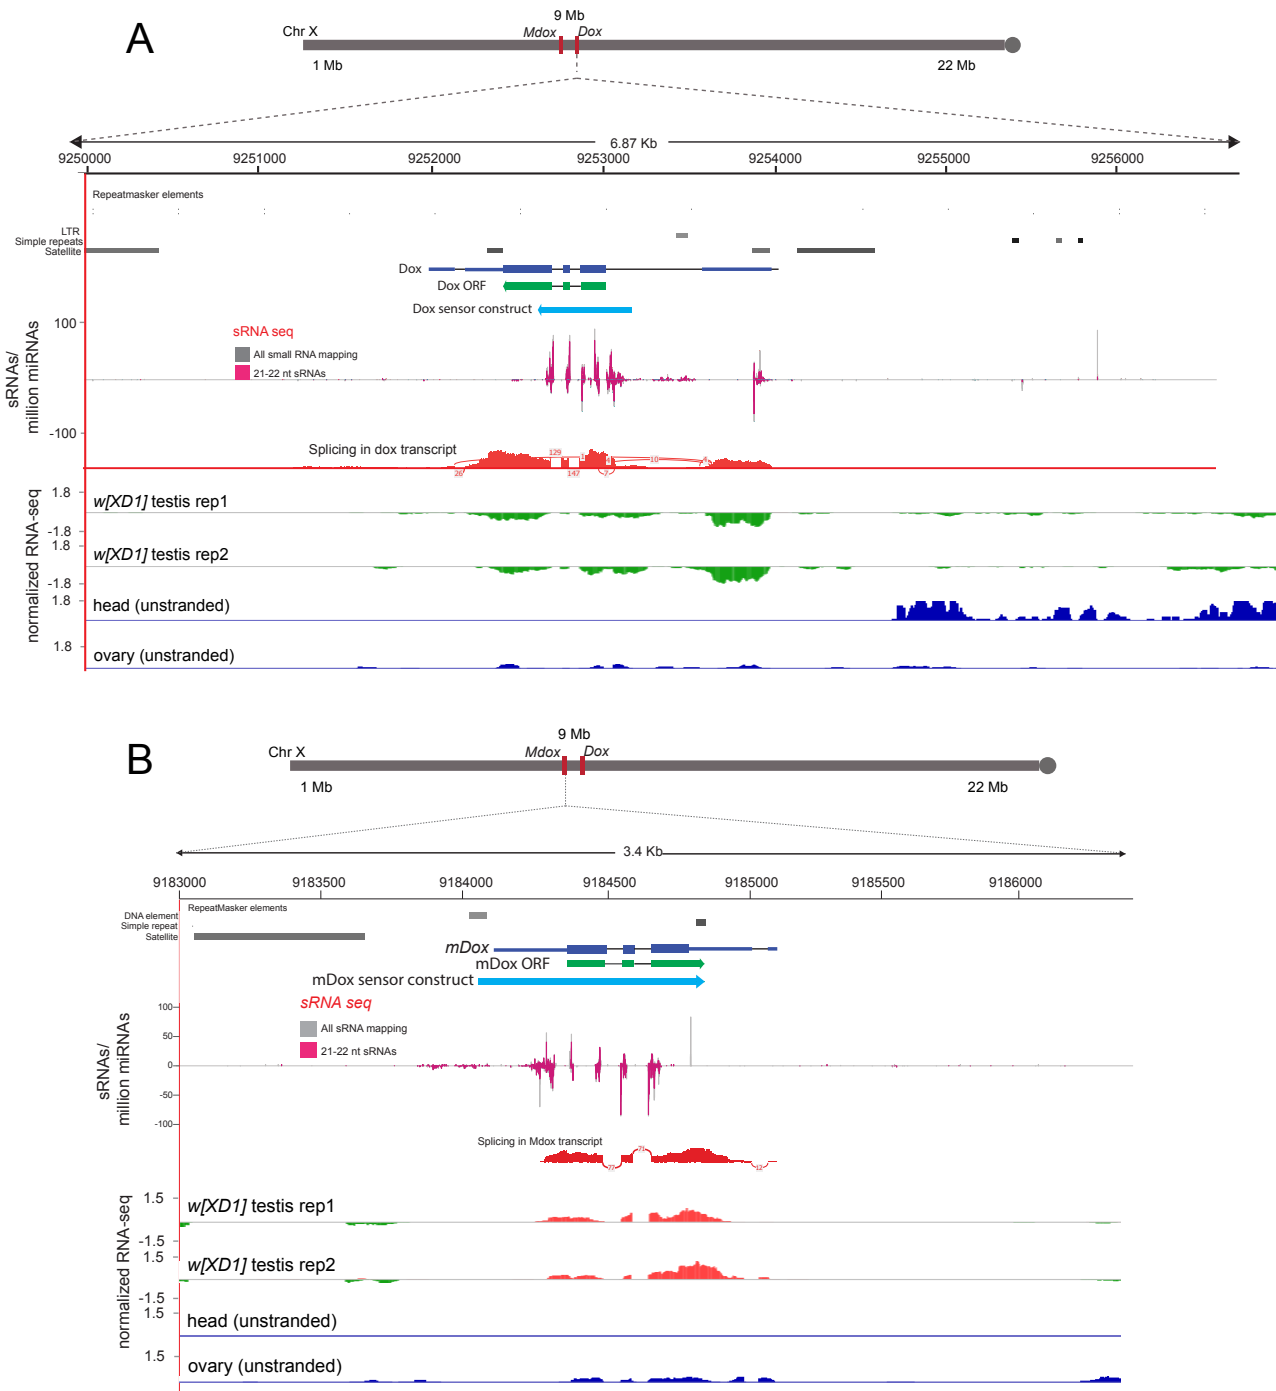

**Figure S3, Related to Figure 4.**  
**Genomics of the Dox and MDox loci, which are closely linked on the X chromosome.**

(A) Summary of RNA-seq and *Nmy/Tmy* small RNA matching to the *Dox* locus. *Dox* is much higher expressed in testis compared to ovary, and is not detected in head. The *Dox* transcript is extensively targeted by siRNAs. The region used in the *Dox* sensor is indicated. (B) Summary of RNA-seq and *Nmy/Tmy* small RNA matching to the *MDox* locus. *MDox* is much higher expressed in testis compared to ovary, and is not detected in head. The *MDox* transcript is extensively targeted by siRNAs. The region used in the *MDox* sensor is indicated.

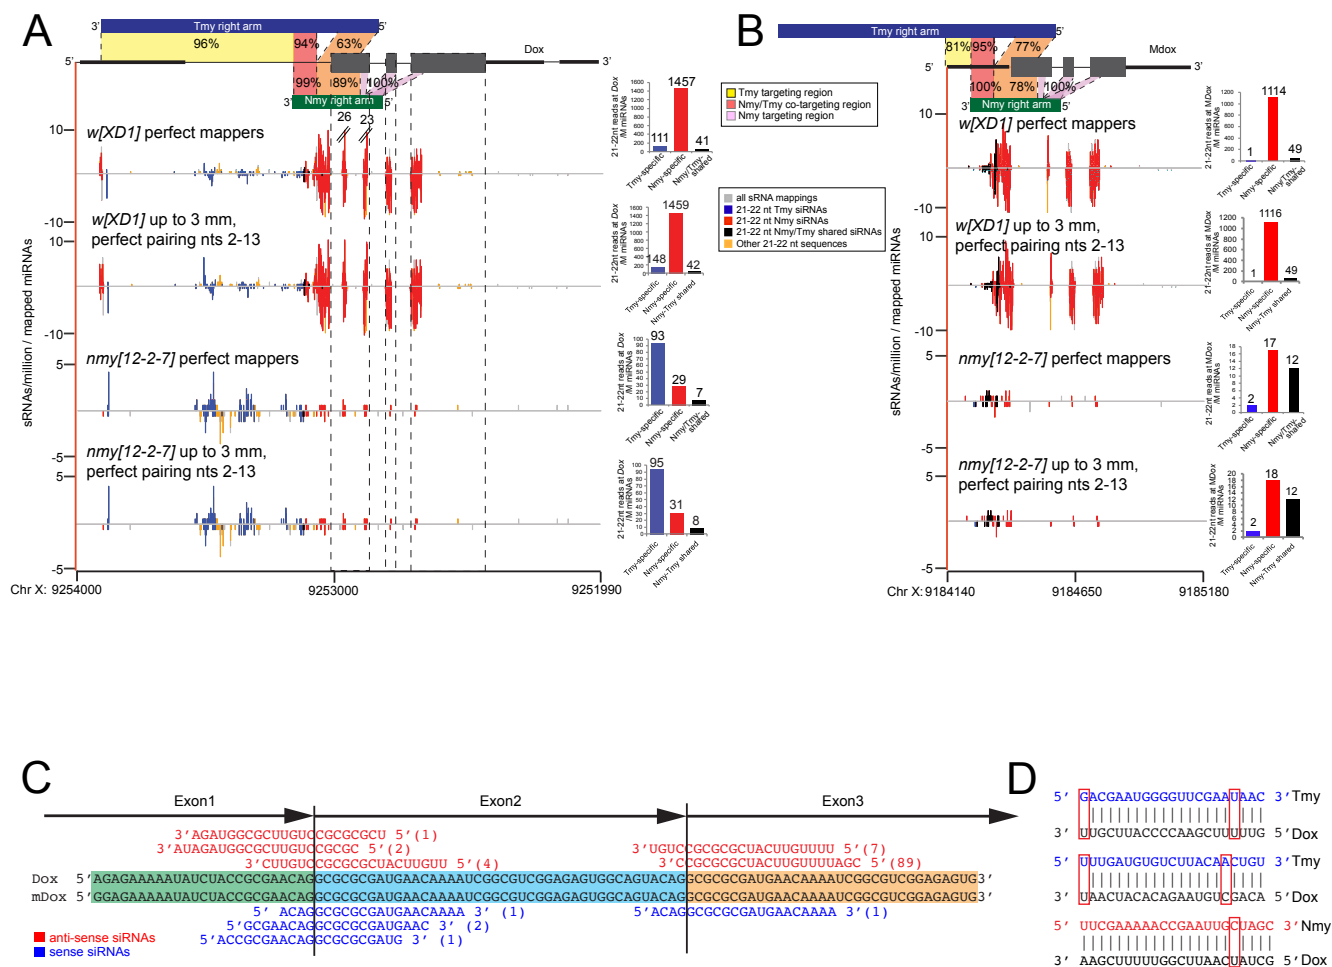

**Figure S4. Related to Figure 4.**  
**Comparison of perfect and imperfect Nmy/Tmy siRNA matching to *Dox/MDox* targets.**

(A) Allowing restricted mismatches, with required perfect pairing in an extended seed region (from siRNA nts 2-13) recovered modest increase in siRNA mapping to the *Dox* and (B) *MDox* loci for *w[XD1]* and *nmy[12-2-7]*, indicating that a strong majority of siRNAs match perfectly to *Dox* and *MDox*. (C) siRNA mapping to *Dox* and *MDox* splice junctions reveal target complementary siRNAs at exon junctions, which are omitted when mapped to *Dox/MDox* DNA sequence. However, mapping to *Dox/MDox* DNA sequence highlights a preponderance of siRNAs mapping only to exons, evident from the homology relationship that *Nmy* hpRNA loci contains a retroposed copy of the *Dox/MDox* target. (D) Examples of siRNA complementary targeting with restricted mismatches allowed at nts 1 and 14 and above, preserving and extended siRNA seed pairing through nts 2-13.

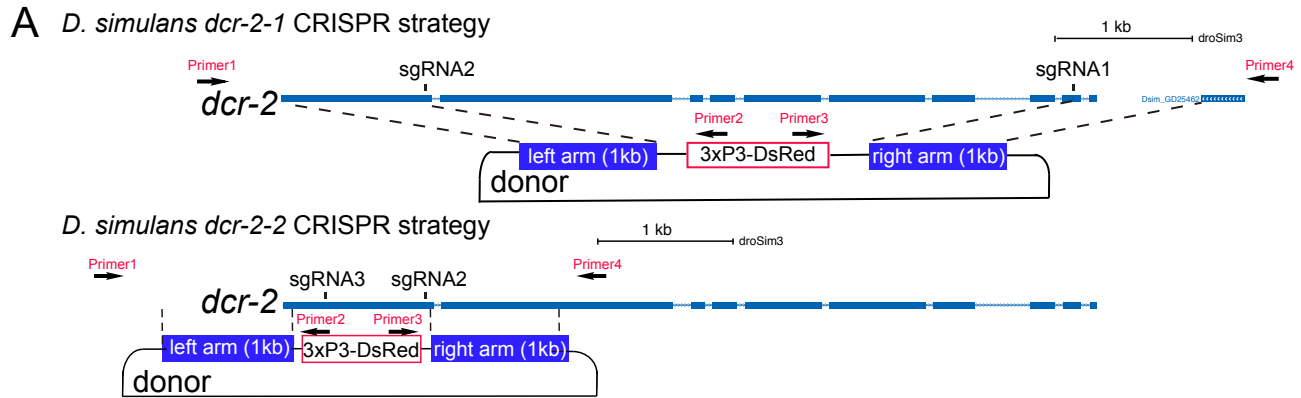

**Validation of *D. simulans* *dcr-2-1* replacements**

**B**

- PCR to verify integration site

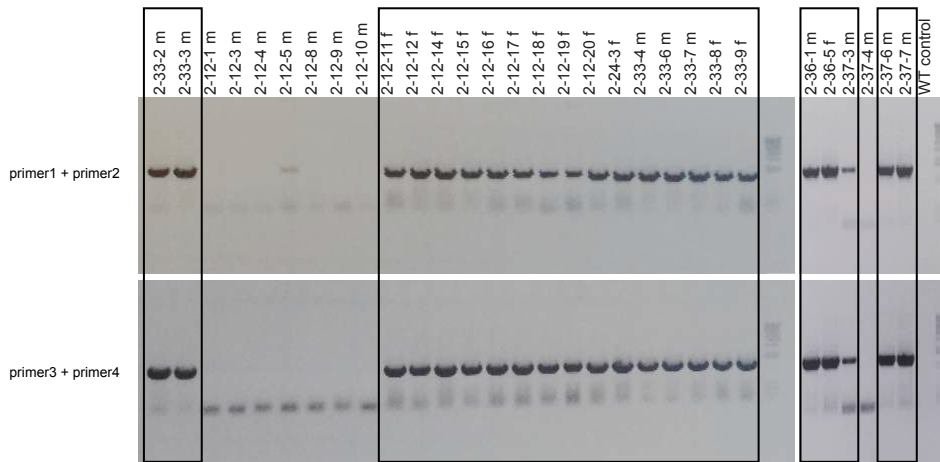

**C**

- PCR to validate individual homozygous *dcr-2-1* mutant flies picked based on DsRed fluorescence

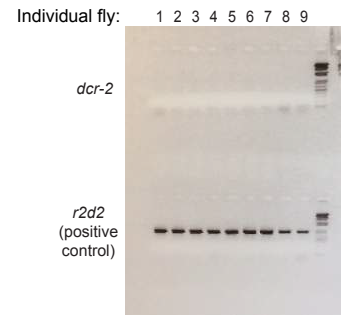

**Validation of *D. simulans* *dcr-2-2* replacements**

**D**

- PCR to verify integration site

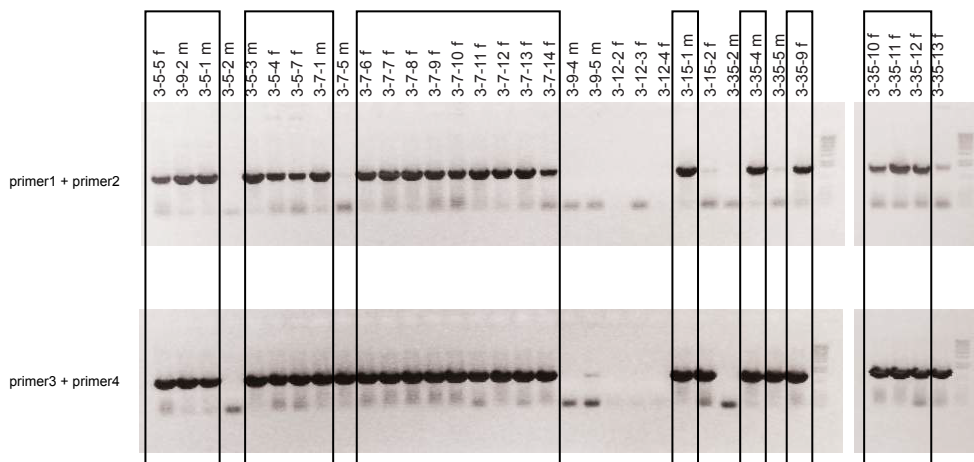

**E**

- PCR to validate individual homozygous *dcr-2-2* mutant flies picked based on DsRed fluorescence

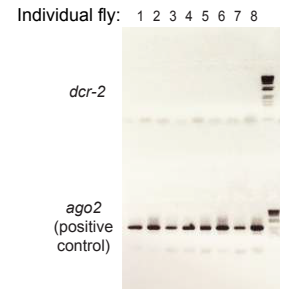

**Figure S5. Related to Figure 4. *Dcr-2* CRISPR mutagenesis strategy and validation.**

(A) Location of *dcr-2* sgRNAs, homology donor arms and 3xP3-DsRed reporter used for mutant selection to generate two different deletion alleles of *dcr-2* (*dcr-2-1* and *dcr-2-2*). (B-C) Selection and validation of *dcr-2-1* mutants. (B) Candidate DsRed positive flies were genotyped for marker integration at the *dcr2* locus. Boxed PCR tests indicate positive hybrid amplification on both left and right flanks. (C) Genotyping of individual candidate homozygous *dcr-2* mutant animals for deletion of *dcr-2* DNA; amplification of *r2d2* DNA serves as a positive control. (D-E) Selection and validation of *dcr-2-2* mutants. (D) Candidate DsRed founders were genotyped for marker integration at the *dcr-2* locus. Boxed PCR tests indicate positive hybrid amplification on both left and right flanks. Note that some animals only validated on one flank and were not considered further, although they likely contained a disruption of the *dcr-2* gene. (E) Genotyping of individual candidate homozygous *dcr-2* mutant animals for deletion of *dcr-2* DNA; amplification of *ago2* DNA serves as a positive control. All primer sequences are listed in Table S2.

*D. simulans* AGO2 CRISPR strategy

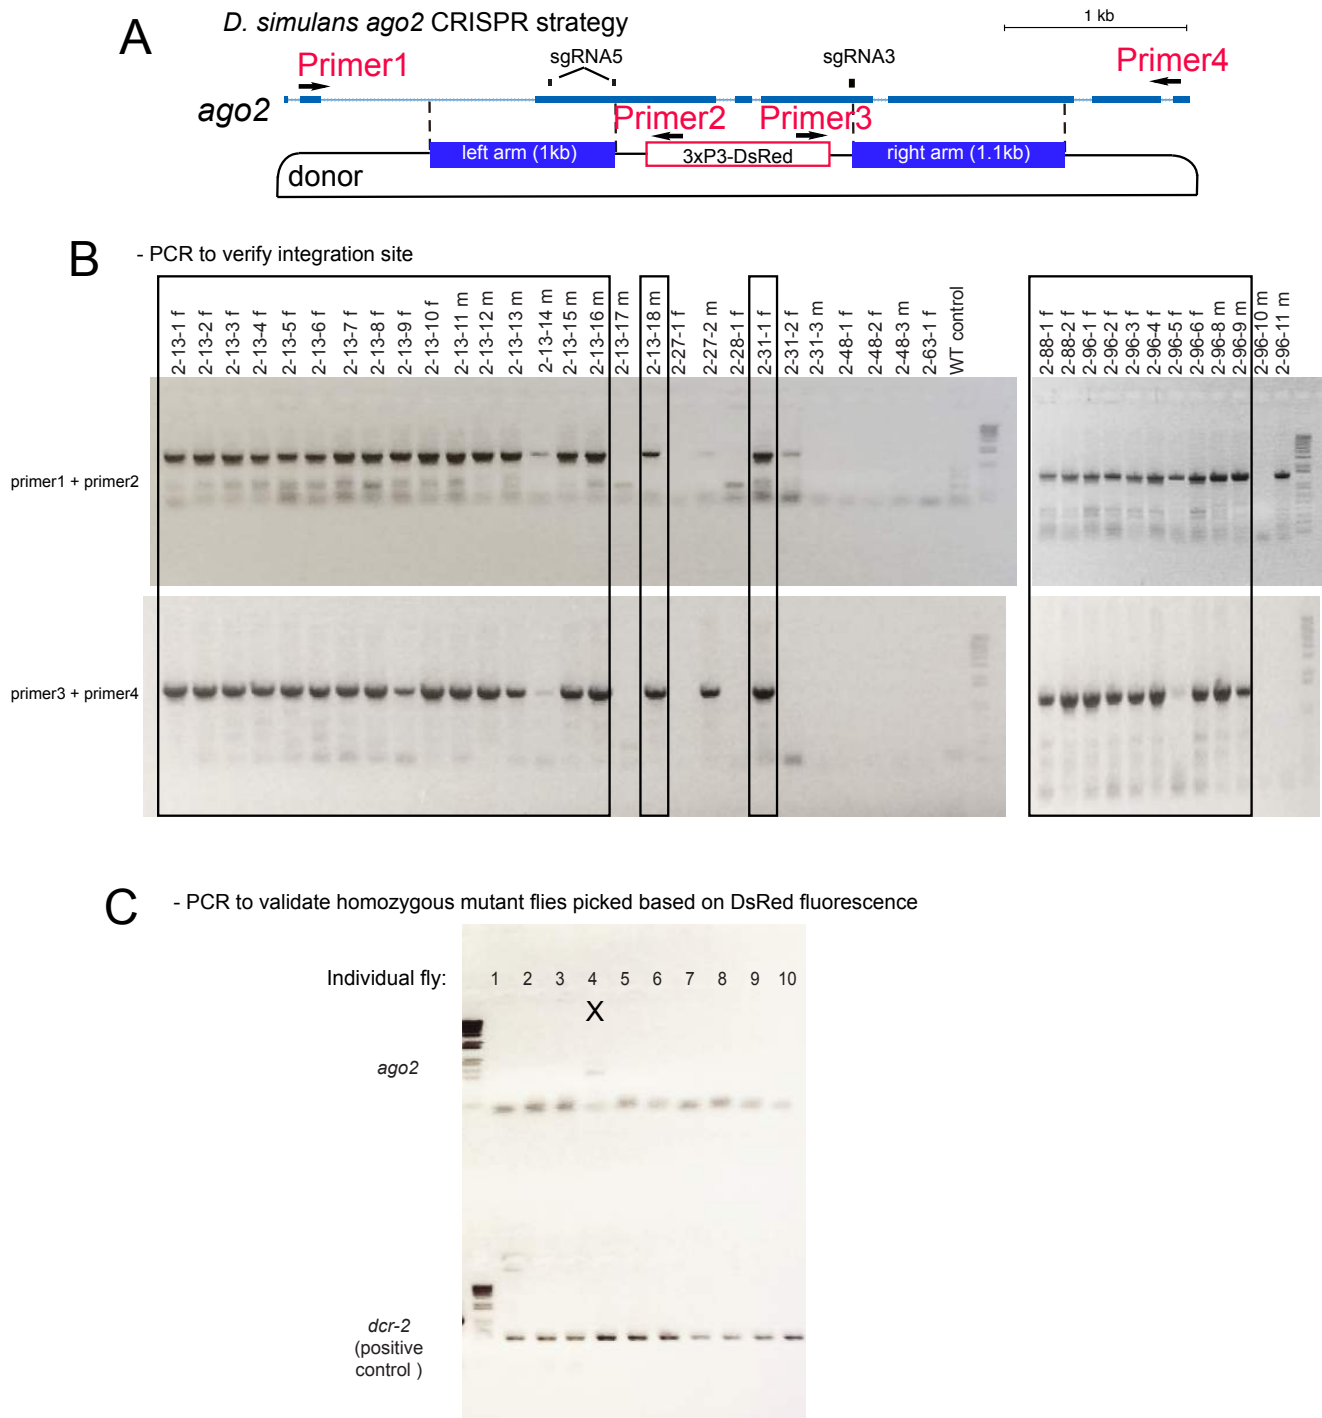

**Figure S6. Related to Figure 4.**  
***Ago2* CRISPR mutagenesis strategy and validation.**

(A) Location of *ago2* sgRNAs, homology donor arms and 3xP3-DsRed reporter used for mutant selection. (B) Candidate DsRed positive mutants were genotyped for marker integration at the *ago2* locus. Boxed PCR tests indicate positive hybrid amplification on both left and right flanks. Note that some animals only validated on one flank and were not considered further, although they likely contained a disruption of the *ago2* gene. (C) Genotyping of individual candidate homozygous *ago2* mutant animals for deletion of *ago2* DNA; amplification of *dcr-2* DNA serves as a positive control. Note that fluorescence is not entirely reliable for genotyping, since lane 4 indicates a false positive (X) heterozygote with detection of wildtype *ago2* DNA. All primer sequences are listed in Table S2.

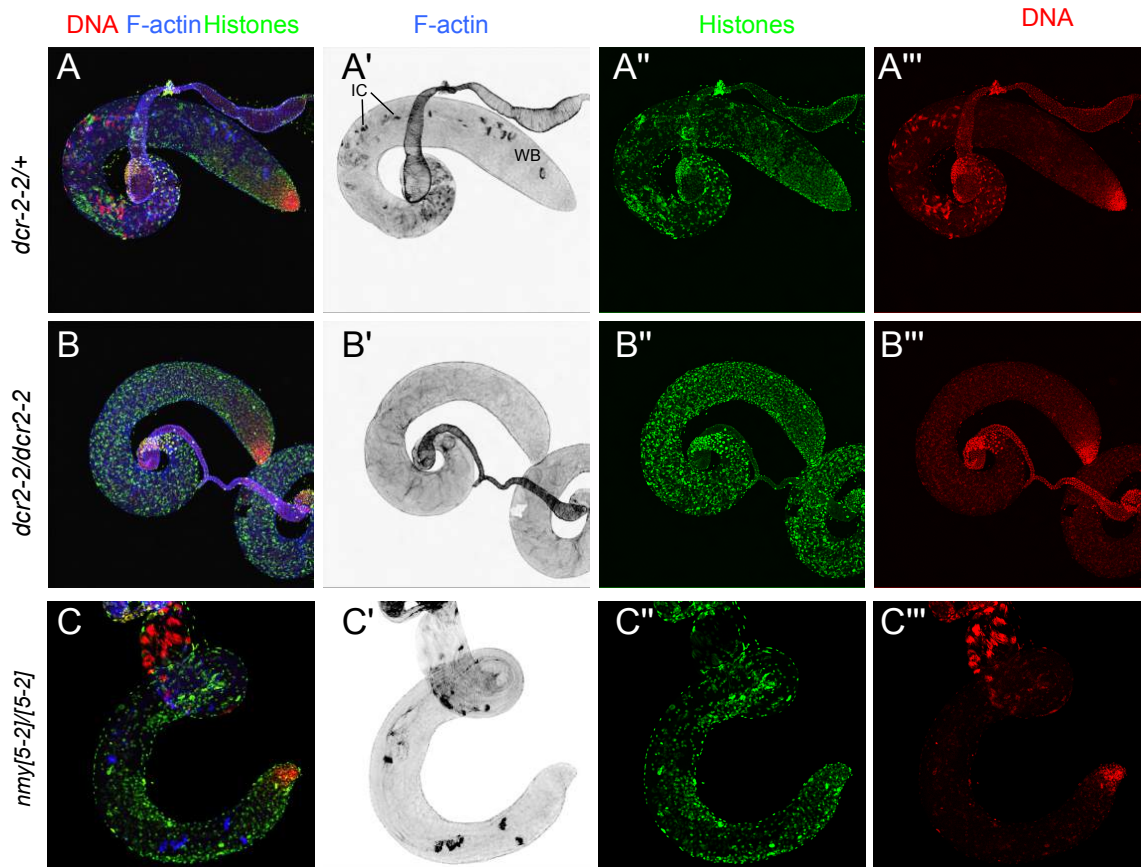

**Figure S7. Related to Figure 6.**  
**Cytological analysis of *dcr-2-2* mutants and *nmy[5-2]* mutants.**

(A-C) Whole testes stained for DNA (red), histones (green) and F-actin (blue), showing that the normal pattern of spermatogenesis in control (A, *dcr-2-2* heterozygote) is severely disrupted in *dcr-2-2* homozygote (B) but not in *nmy[5-2]* homozygote (C) that exhibits severe sex ratio bias. F-actin staining highlights individualization complexes (IC) that separate spermatids into individual cells to form wastebags (WB). These actin structures found in control (A') are completely absent in *dcr-2-2* mutant (B') but are present in *nmy[5-2]* mutant (C') testis. In addition, the histone-to-protamine transition of post-meiotic spermatid nuclei is evident in control testis (A''), but histones remain associated throughout in *dcr-2-2* testis (B''). This transition occurs normally in *nmy* mutant testis (C'').

**Table S1, Related to Figure 1, 2, 3, S3 and S4.**  
**Small RNA and RNA-seq libraries used in this study.**  
 This table depicts the details of public and new small RNA and RNA-seq datasets analyzed in this study.  
 For each dataset, its tissue origin and mapping statistics are provided.

| Sample                                                              | Tissue      | Total reads | mapped reads       | type                           | map % | Non paired | Unmapped | non-unique | Unique   | Read 1   | Read 2    | Reads map | Reads map | Non-splice | Splice junction | Proport ratio |
|---------------------------------------------------------------------|-------------|-------------|--------------------|--------------------------------|-------|------------|----------|------------|----------|----------|-----------|-----------|-----------|------------|-----------------|---------------|
| accSRA_acc                                                          | tissue      |             | total mapped reads |                                |       |            |          |            |          |          |           |           |           |            |                 |               |
| M023                                                                | head        |             | 38990369           |                                |       |            |          |            |          |          |           |           |           |            |                 |               |
| SRR1205790                                                          | male_body   |             | 37988067           |                                |       |            |          |            |          |          |           |           |           |            |                 |               |
| M025                                                                | embryo      |             | 79194312           |                                |       |            |          |            |          |          |           |           |           |            |                 |               |
| M053                                                                | female_body |             | 123490687          |                                |       |            |          |            |          |          |           |           |           |            |                 |               |
| V044                                                                | embryo      |             | 117360240          |                                |       |            |          |            |          |          |           |           |           |            |                 |               |
| SRR653485                                                           | ovary       |             | 394537604          | Chicharo, 3 day-old Ovaries    |       |            |          |            |          |          |           |           |           |            |                 |               |
| SRR653486                                                           | ovary       |             | 474328738          | Malindu, 3 day-old Ovaries     |       |            |          |            |          |          |           |           |           |            |                 |               |
| SRR653487                                                           | egg         |             | 254889630          | NRT_0-2 hours_egg98            |       |            |          |            |          |          |           |           |           |            |                 |               |
| SRR653488                                                           | egg         |             | 203161228          | RT_0-2 hours_egg98             |       |            |          |            |          |          |           |           |           |            |                 |               |
| SRR618934                                                           | ovary       |             | 278925212          | dsm_W901_ovaries               |       |            |          |            |          |          |           |           |           |            |                 |               |
| SRR618935                                                           | body        |             | 141315165          | F_1dmeI-dsm1_interspecies_body |       |            |          |            |          |          |           |           |           |            |                 |               |
| SRR902008                                                           | ovary       |             | 196907535          | ovary                          |       |            |          |            |          |          |           |           |           |            |                 |               |
| SRR902009                                                           | testis      |             | 100562829          | testis                         |       |            |          |            |          |          |           |           |           |            |                 |               |
| small RNA datasets produced for this study                          |             |             |                    |                                |       |            |          |            |          |          |           |           |           |            |                 |               |
| wXD1_1_sRNA                                                         | testes      |             | 19079372           | testes - wildtype              |       |            |          |            |          |          |           |           |           |            |                 |               |
| wXD1_2_sRNA                                                         | testes      |             | 5869386            | testes - wildtype              |       |            |          |            |          |          |           |           |           |            |                 |               |
| 12-2-7_1_sRNA                                                       | testes      |             | 17694739           | testes - rmy mutant            |       |            |          |            |          |          |           |           |           |            |                 |               |
| 12-2-7_2_sRNA                                                       | testes      |             | 11226479           | testes - rmy mutant            |       |            |          |            |          |          |           |           |           |            |                 |               |
| <b>Mapping statistics for RNA-seq libraries used in this study.</b> |             |             |                    |                                |       |            |          |            |          |          |           |           |           |            |                 |               |
| SRR1107945                                                          | Head        | 6130129     | 5416328            | Paired, unstr                  | 88.36 | 347285     | 713801   | 124082     | 4944961  | 2529102  | 2416859   | 2479528   | 2465433   | 4651085    | 293876          | 4338926       |
| SRR330570                                                           | Ovary       | 81046293    | 65750134           | Paired, unstr                  | 81.13 | 27035605   | 15296159 | 12070538   | 26543991 | 13521221 | 13122770  | 13241693  | 13402298  | 18726432   | 7918559         | 22865244      |
| wXD1_1                                                              | testis      | 29917669    | 29240366           | Paired, stran                  | 97.74 | 3998809    | 677303   | 2245876    | 22995681 | 11510649 | 114885032 | 11503335  | 11492346  | 20533691   | 2441990         | 22621452      |
| wXD1_2                                                              | testis      | 33177913    | 32393175           | Paired, stran                  | 97.63 | 4274447    | 784738   | 2400445    | 25718283 | 12882002 | 12836281  | 12869703  | 12849580  | 22983207   | 2735076         | 241724214     |



| <b>Table S2. Related to STAR methods. Oligonucleotides used in this study.</b>                                 |                                                              |                                  |
|----------------------------------------------------------------------------------------------------------------|--------------------------------------------------------------|----------------------------------|
| This table lists all primers used for cloning and for generating RNA-seq libraries, and oligos used as probes. |                                                              |                                  |
| <b>Primers for pDCC6-sgRNA construct</b>                                                                       |                                                              |                                  |
| ago2 sgRNA3:GTAGTTGCGACTGTGGAAGT (AGG)                                                                         | Fwd                                                          | cttcGTAGTTGCGACTGTGGAAGT         |
|                                                                                                                | Rev                                                          | aaacACTTCCACAGTCGAACTAC          |
| ago2 sgRNA4:GCTCATTGGTAGCTGCTCG (CGG)                                                                          | Fwd                                                          | cttcGCTCAITTTGGTAGCTGCTCG        |
|                                                                                                                | Rev                                                          | aaacCGAGCAGTACCAAATGAGC          |
| ago2 sgRNA5:GAAACACAAGGCCAGGCTC (GGG)                                                                          | Fwd                                                          | cttcGAAACACAAGGCCAGGCTC          |
|                                                                                                                | Rev                                                          | aaacGAGCCTGGCCTTGTGTTTTTC        |
| dcr-2 sgRNA1:GGCATTGTATACCTGCCAC (AGG)                                                                         | Fwd                                                          | cttcGGCATTGTATACCTGCCAC          |
|                                                                                                                | Rev                                                          | aaacGTGGGCGGTATACAATGCC          |
| dcr-2 sgRNA2:GGTGATAGCCGATACCCCTTG (AGG)                                                                       | Fwd                                                          | cttcGGTGATAGCCGATACCCCTTG        |
|                                                                                                                | Rev                                                          | aaacCAAGGGTATCGGCTATCACC         |
| dcr-2 sgRNA3:GACGTTGGGGATGTTCTGG (AGG)                                                                         | Fwd                                                          | cttcGACGTTGGGGATGTTCTGG          |
|                                                                                                                | Rev                                                          | aaacCCAGAACATCCCCAACGTC          |
| <b>Primers for pH-DsRed HRD construct</b>                                                                      |                                                              |                                  |
| ago2 sgRNA3 and sgRNA5                                                                                         | Left arm Fwd                                                 | GAGGAATTCGACGTGGTTGTATAGAACCTATG |
|                                                                                                                | Left arm Rev                                                 | GACCCGGCGCTGGCCTGTGTTTTCTGTCC    |
|                                                                                                                | Right arm Fwd                                                | GAGGGCGCGCTCCACAGTCGCAACTACCATTG |
|                                                                                                                | Right arm Rev                                                | GAACCTGAGCCAAAGTTACTGTGATCATGTC  |
| dcr-2 sgRNA1 and sgRNA2                                                                                        | Left arm Fwd                                                 | GAGGAATTCGCTTGGCCTGGTCTTATTCG    |
|                                                                                                                | Left arm Rev                                                 | GACCCGGCGTTGAGGCGTATTGGCGTG      |
|                                                                                                                | Right arm Fwd                                                | GAGACTAGTGGCAGGTATACAATGCCATTGC  |
|                                                                                                                | Right arm Rev                                                | GAAGGCGCGCCAGCCAGCAGTGTATGATGC   |
| dcr-2 sgRNA2 and sgRNA3                                                                                        | Left arm Fwd                                                 | GAGGAATTCGGGGTAACCCAAATGTTAC     |
|                                                                                                                | Left arm Rev                                                 | GACCCGGCGCCAAAGAGCTTGGGGGATGTC   |
|                                                                                                                | Right arm Fwd                                                | GAGACTAGTGGGTATCGGCTATCACCCTTG   |
|                                                                                                                | Right arm Rev                                                | GAAGGCGCGCGGTATCGAGGAGCCGAAATC   |
| <b>Primers for genotyping</b>                                                                                  |                                                              |                                  |
| Checking deletion                                                                                              |                                                              |                                  |
| ago2(DsRed)                                                                                                    | ago2 sgRNA3 target Fwd                                       | ggaatctcgcgacgtctcttg            |
|                                                                                                                | ago2 sgRNA3 target Rev                                       | gatgctggatccaggttgac             |
|                                                                                                                | ago2 sgRNA5 target Fwd                                       | gagatacaaatatttctatcg            |
|                                                                                                                | ago2 sgRNA5 target Rev                                       | ggattggccttgctctggg              |
| dcr-2(DsRed)                                                                                                   | dcr2 sgRNA1 target Fwd                                       | cagtaaacatgcaagagcc              |
|                                                                                                                | dcr2 sgRNA1 target Rev                                       | cgatttcaactcactcttc              |
|                                                                                                                | dcr2 sgRNA2 target Fwd                                       | ccgcttctggaaggatgctc             |
|                                                                                                                | dcr2 sgRNA2 target Rev                                       | atcgctctcagcagaatg               |
|                                                                                                                | dcr2 sgRNA3 target Fwd                                       | gttcgctcagcccgctggac             |
|                                                                                                                | dcr2 sgRNA3 target Rev                                       | ttaggcctgcaattcttagc             |
| Checking insertion of DsRed                                                                                    |                                                              |                                  |
| Primers on 3XP3-DsRed                                                                                          | 3xP3 Rev                                                     | ATTGTCGCTCCGTAGACGAGC            |
|                                                                                                                | UniSV40 seq fwd                                              | GTTAACTTGTTTATGACAGTTATAATGG     |
| ago2(DsRed)                                                                                                    | AGO2 insertion site left fwd                                 | CATTCTCGGCTATGTAAAAAAC           |
|                                                                                                                | AGO2 insertion site right rev                                | GGCCGTGGCTCACGCCATCTCGG          |
| dcr-2(DsRed)-1                                                                                                 | Dcr2-1 insertion site left fwd                               | GGAACTCGAATGGAATCTAG             |
|                                                                                                                | Dcr2-1 insertion site right rev                              | CTTCTACTCTCTTCTCTCGTC            |
| dcr-2(DsRed)-2                                                                                                 | Dcr2-2 insertion site left fwd                               | CGACAGCGCATCAATAAGCC             |
|                                                                                                                | Dcr2-2 insertion site right rev                              | GCTGCCTTCAATGGAACG               |
| <b>Primers for cloning hpRNA constructs</b>                                                                    |                                                              |                                  |
| Nmy/mmy_F                                                                                                      | ATAAGAATCGGGCCGACACACCTCTGCCAAGTAG                           |                                  |
| Nmy/mmy_R                                                                                                      | CTAGTCTAGAATTTTAGTTCAATTTTATAACCAATATAC                      |                                  |
| Tmy_F                                                                                                          | ATAAGAATCGGGCCGCTCAATTTGGAATGTTATACC                         |                                  |
| Tmy_Loop_R                                                                                                     | CCGCTCGAGACGGTATAACGGCATCTTG                                 |                                  |
| Tmy_Loop_F                                                                                                     | CCGCTCGAGTAGTTCATCATATTAGCGGTAGCGATTTCTGA                    |                                  |
| Tmy_R                                                                                                          | GCTCTAGAGCCTGAATTTGGAATGTTATACC                              |                                  |
| <b>Primers for cloning sensor constructs.</b>                                                                  |                                                              |                                  |
| Dox-sensor-F                                                                                                   | AAAAGGAAAAGCGGCCCATCTAGTTGGCGTGGGTT                          |                                  |
| Dox-sensor-R                                                                                                   | CCGCTCGAGGTTGGCAGCGCATCGCTGG                                 |                                  |
| mDox-sensor-F                                                                                                  | CGGGCCGCACTTAGTCTCCGACCATATA                                 |                                  |
| mDox-sensor-R                                                                                                  | GGACTAGTAAAAGACAAACCAACCAAA                                  |                                  |
| <b>qPCR primers</b>                                                                                            |                                                              |                                  |
| Dox-qPCR-F                                                                                                     | CTAGGGATTCTTGAATCTTTTA                                       |                                  |
| mDox-qPCR-F                                                                                                    | CTAGCGATTATGGTATCCCTA                                        |                                  |
| Dox/mDox-qPCR-R                                                                                                | CATCGCGCCTGTACT                                              |                                  |
| Rpl32 fw                                                                                                       | CCGCTTCAAGGGACAGTATC                                         |                                  |
| Rpl32 rev                                                                                                      | ACGTTGTGCACAGGAACCT                                          |                                  |
| <b>probes for Northern blotting_Nmy</b>                                                                        |                                                              |                                  |
| Nmy_5388                                                                                                       | ATGTGCTTACAGCTGTCCCA                                         |                                  |
| Nmy_2307                                                                                                       | GTGTCTACAGCTGTCCCAAG                                         |                                  |
| Nmy_2210                                                                                                       | CTCTCGACGCCGATTTTGT                                          |                                  |
| Nmy_2065                                                                                                       | TTGATGTGTCTTACAGCTGTG                                        |                                  |
| Nmy_1829                                                                                                       | CTCTCGACGCCGATTTGT                                           |                                  |
| Nmy_1684                                                                                                       | TGTGTCTTACAGCTGTCCAA                                         |                                  |
| Nmy_630                                                                                                        | GCTGTATACGTGTACGGCAAC                                        |                                  |
| Nmy/Tmy_551                                                                                                    | ACACGTATACAGTAGCAATT                                         |                                  |
| Nmy/Tmy_444                                                                                                    | GTACACGTATACAGTAGCAA                                         |                                  |
| <b>probes for Northern blotting_Tmy specific</b>                                                               |                                                              |                                  |
| Tmy_989                                                                                                        | GTTATCGAACCCATTCTGCA                                         |                                  |
| Tmy_514                                                                                                        | ATGTGCTTACAACGTACCA                                          |                                  |
| Tmy_13081                                                                                                      | ATGCCTTCGATCAATCCATT                                         |                                  |
| Tmy_13070                                                                                                      | ATACCGTAGAGAACATCCAGA                                        |                                  |
| Tmy_528                                                                                                        | AACTCCCTCTCTTTCTTT                                           |                                  |
| <b>oligos for small RNA library cloning</b>                                                                    |                                                              |                                  |
| illumina_RT_primer                                                                                             | GCCTTGGCACCCGAGAATTCCA                                       |                                  |
| illumina_PCR_FW                                                                                                | AATGATACGGGACCCAGGATCTACAGTTCAGAGTTCAGTCCGA                  |                                  |
| illumina_PCR_REV                                                                                               | CAAGCAGAAGACGGCATAACGATCGTATGTACTGGAGTTCCTGGCACCCGAGAATTCCA  |                                  |
| 3' linker                                                                                                      | 5' phos-TGGAATTCCTGGGTGCAAGG-ddC 3'                          |                                  |
| 5' linker                                                                                                      | 5' ddT- rGrUrCrArGrArGrUrUrCrArCrArGrUrCrCrGrArUrC 3'        |                                  |
|                                                                                                                | standard illumina barcode primers were used for multiplexing |                                  |
